# Supplementary material
Source: MDPI journal article supplement (https://www.mdpi.com/2073-4344/10/9/1002)

# checkCIF/PLATON report

You have not supplied any structure factors. As a result the full set of tests cannot be run.

THIS REPORT IS FOR GUIDANCE ONLY. IF USED AS PART OF A REVIEW PROCEDURE FOR PUBLICATION, IT SHOULD NOT REPLACE THE EXPERTISE OF AN EXPERIENCED CRYSTALLOGRAPHIC REFEREE.

No syntax errors found.      CIF dictionary      Interpreting this report

## Datablock: Fe3

---

Bond precision:    C-C = 0.0044 Å                      Wavelength=1.54184

Cell:                      a=32.4190(2)              b=32.4190(2)              c=31.8280(3)  
                                    alpha=90                      beta=90                      gamma=90  
Temperature:              170 K

|                        | Calculated                       | Reported          |
|------------------------|----------------------------------|-------------------|
| Volume                 | 33451.0(5)                       | 33451.0(5)        |
| Space group            | I 41/a                           | I 41/a            |
| Hall group             | -I 4ad                           | -I 4ad            |
| Moiety formula         | C92 H91 Cl2 Fe N3 [+<br>solvent] | C92 H91 Cl2 Fe N3 |
| Sum formula            | C92 H91 Cl2 Fe N3 [+<br>solvent] | C92 H89 Cl2 Fe N3 |
| Mr                     | 1365.43                          | 1363.41           |
| Dx, g cm <sup>-3</sup> | 1.084                            | 1.083             |
| Z                      | 16                               | 16                |
| Mu (mm <sup>-1</sup> ) | 2.359                            | 2.359             |
| F000                   | 11584.0                          | 11552.0           |
| F000'                  | 11604.33                         |                   |
| h,k,lmax               | 40,40,39                         | 36,40,39          |
| Nref                   | 17360                            | 16088             |
| Tmin,Tmax              | 0.753,0.889                      | 0.743,1.000       |
| Tmin'                  | 0.702                            |                   |

Correction method= # Reported T Limits: Tmin=0.743 Tmax=1.000  
AbsCorr = MULTI-SCAN

Data completeness= 0.927                      Theta(max)= 75.566

R(reflections)= 0.0531( 13594)              wR2(reflections)= 0.1417( 16088)

S = 1.026                                      Npar= 967

---

The following ALERTS were generated. Each ALERT has the format

**test-name\_ALERT\_alert-type\_alert-level.**

Click on the hyperlinks for more details of the test.

---

### ● Alert level C

|                   |                                             |           |                                 |       |       |        |
|-------------------|---------------------------------------------|-----------|---------------------------------|-------|-------|--------|
| PLAT029_ALERT_3_C | _diffn_measured_fraction_theta_full         | value     | Low                             | .     | 0.965 | Why?   |
| PLAT094_ALERT_2_C | Ratio of Maximum / Minimum Residual Density | ...       |                                 |       | 2.85  | Report |
| PLAT220_ALERT_2_C | NonSolvent Resd 1                           | C         | Ueq(max)/Ueq(min)               | Range | 4.7   | Ratio  |
| PLAT222_ALERT_3_C | NonSolvent Resd 1                           | H         | Uiso(max)/Uiso(min)             | Range | 4.2   | Ratio  |
| PLAT230_ALERT_2_C | Hirshfeld Test Diff for                     | C34       | --C35                           | .     | 6.0   | s.u.   |
| PLAT234_ALERT_4_C | Large Hirshfeld Difference                  | C30       | --C31                           | .     | 0.19  | Ang.   |
| PLAT241_ALERT_2_C | High                                        | 'MainMol' | Ueq as Compared to Neighbors of |       | C10   | Check  |
| PLAT241_ALERT_2_C | High                                        | 'MainMol' | Ueq as Compared to Neighbors of |       | C37   | Check  |
| PLAT241_ALERT_2_C | High                                        | 'MainMol' | Ueq as Compared to Neighbors of |       | C38   | Check  |
| PLAT241_ALERT_2_C | High                                        | 'MainMol' | Ueq as Compared to Neighbors of |       | C51   | Check  |
| PLAT241_ALERT_2_C | High                                        | 'MainMol' | Ueq as Compared to Neighbors of |       | C69   | Check  |
| PLAT241_ALERT_2_C | High                                        | 'MainMol' | Ueq as Compared to Neighbors of |       | C70   | Check  |
| PLAT241_ALERT_2_C | High                                        | 'MainMol' | Ueq as Compared to Neighbors of |       | C75   | Check  |
| PLAT241_ALERT_2_C | High                                        | 'MainMol' | Ueq as Compared to Neighbors of |       | C76   | Check  |
| PLAT241_ALERT_2_C | High                                        | 'MainMol' | Ueq as Compared to Neighbors of |       | C78   | Check  |
| PLAT242_ALERT_2_C | Low                                         | 'MainMol' | Ueq as Compared to Neighbors of |       | C68   | Check  |
| PLAT242_ALERT_2_C | Low                                         | 'MainMol' | Ueq as Compared to Neighbors of |       | C71   | Check  |
| PLAT242_ALERT_2_C | Low                                         | 'MainMol' | Ueq as Compared to Neighbors of |       | C74   | Check  |
| PLAT242_ALERT_2_C | Low                                         | 'MainMol' | Ueq as Compared to Neighbors of |       | C77   | Check  |
| PLAT331_ALERT_2_C | Small Aver Phenyl C-C Dist                  | C28       | --C33                           | .     | 1.36  | Ang.   |
| PLAT331_ALERT_2_C | Small Aver Phenyl C-C Dist                  | C74       | --C79                           | .     | 1.36  | Ang.   |
| PLAT332_ALERT_2_C | Large Phenyl C-C Range                      | C28       | -C33                            | .     | 0.20  | Ang.   |
| PLAT332_ALERT_2_C | Large Phenyl C-C Range                      | C01J      | -C02M                           | .     | 0.20  | Ang.   |

---

### ● Alert level G

FORMU01\_ALERT\_1\_G There is a discrepancy between the atom counts in the  
\_chemical\_formula\_sum and \_chemical\_formula\_moiety. This is  
usually due to the moiety formula being in the wrong format.  
Atom count from \_chemical\_formula\_sum: C92 H89 Cl2 Fe1 N3  
Atom count from \_chemical\_formula\_moiety:C92 H91 Cl2 Fe1 N3

FORMU01\_ALERT\_2\_G There is a discrepancy between the atom counts in the  
\_chemical\_formula\_sum and the formula from the \_atom\_site\* data.  
Atom count from \_chemical\_formula\_sum:C92 H89 Cl2 Fe1 N3  
Atom count from the \_atom\_site data: C92 H91 Cl2 Fe1 N3

CELLZ01\_ALERT\_1\_G Difference between formula and atom\_site contents detected.

CELLZ01\_ALERT\_1\_G ALERT: Large difference may be due to a  
symmetry error - see SYMMG tests  
From the CIF: \_cell\_formula\_units\_Z 16  
From the CIF: \_chemical\_formula\_sum C92 H89 Cl2 Fe N3  
TEST: Compare cell contents of formula and atom\_site data

| atom | Z*formula | cif sites | diff   |
|------|-----------|-----------|--------|
| C    | 1472.00   | 1472.00   | 0.00   |
| H    | 1424.00   | 1456.00   | -32.00 |
| Cl   | 32.00     | 32.00     | 0.00   |
| Fe   | 16.00     | 16.00     | 0.00   |
| N    | 48.00     | 48.00     | 0.00   |

PLAT003\_ALERT\_2\_G Number of Uiso or Uij Restrained non-H Atoms ... 107 Report

PLAT012\_ALERT\_1\_G N.O.K. \_shelx\_res\_checksum Found in CIF ..... Please Check

PLAT013\_ALERT\_1\_G N.O.K. \_shelx\_hkl\_checksum Found in CIF ..... Please Check

PLAT014\_ALERT\_1\_G N.O.K. \_shelx\_fab\_checksum Found in CIF ..... Please Check

PLAT041\_ALERT\_1\_G Calc. and Reported SumFormula Strings Differ Please Check

PLAT068\_ALERT\_1\_G Reported F000 Differs from Calcd (or Missing)... Please Check

PLAT083\_ALERT\_2\_G SHELXL Second Parameter in WGHT Unusually Large 44.40 Why ?

|                   |                                                  |         |        |
|-------------------|--------------------------------------------------|---------|--------|
| PLAT143_ALERT_4_G | s.u. on c - Axis Small or Missing .....          | 0.00030 | Ang.   |
| PLAT178_ALERT_4_G | The CIF-Embedded .res File Contains SIMU Records | 1       | Report |
| PLAT180_ALERT_4_G | Check Cell Rounding: # of Values Ending with 0 = | 3       | Note   |
| PLAT186_ALERT_4_G | The CIF-Embedded .res File Contains ISOR Records | 2       | Report |
| PLAT230_ALERT_2_G | Hirshfeld Test Diff for C02S --C10 .             | 7.7     | s.u.   |
| PLAT232_ALERT_2_G | Hirshfeld Test Diff (M-X) Fe1 --C12 .            | 14.7    | s.u.   |
| PLAT301_ALERT_3_G | Main Residue Disorder .....(Resd 1 )             | 9%      | Note   |
| PLAT410_ALERT_2_G | Short Intra H...H Contact H02D ..H61B .          | 2.13    | Ang.   |
|                   | x,y,z =                                          | 1_555   | Check  |
| PLAT606_ALERT_4_G | Solvent Accessible VOID(S) in Structure .....    | !       | Info   |
| PLAT720_ALERT_4_G | Number of Unusual/Non-Standard Labels .....      | 20      | Note   |
| PLAT794_ALERT_5_G | Tentative Bond Valency for Fe1 (II) .            | 2.13    | Info   |
| PLAT860_ALERT_3_G | Number of Least-Squares Restraints .....         | 168     | Note   |
| PLAT869_ALERT_4_G | ALERTS Related to the Use of SQUEEZE Suppressed  | !       | Info   |
| PLAT933_ALERT_2_G | Number of OMIT Records in Embedded .res File ... | 1       | Note   |
| PLAT941_ALERT_3_G | Average HKL Measurement Multiplicity .....       | 4.0     | Low    |
| PLAT950_ALERT_5_G | Calculated (ThMax) and CIF-Reported Hmax Differ  | 4       | Units  |

---

0 **ALERT level A** = Most likely a serious problem - resolve or explain  
0 **ALERT level B** = A potentially serious problem, consider carefully  
23 **ALERT level C** = Check. Ensure it is not caused by an omission or oversight  
27 **ALERT level G** = General information/check it is not something unexpected

8 ALERT type 1 CIF construction/syntax error, inconsistent or missing data  
27 ALERT type 2 Indicator that the structure model may be wrong or deficient  
5 ALERT type 3 Indicator that the structure quality may be low  
8 ALERT type 4 Improvement, methodology, query or suggestion  
2 ALERT type 5 Informative message, check

---

## Datablock: Fe5

---

Bond precision: C-C = 0.0185 A                      Wavelength=0.71073

Cell:                      a=18.8805(6)              b=19.1069(5)              c=35.1775(10)  
                                    alpha=90                      beta=90                      gamma=90

Temperature:              173 K

|                | Calculated                           | Reported                             |
|----------------|--------------------------------------|--------------------------------------|
| Volume         | 12690.2(6)                           | 12690.2(6)                           |
| Space group    | P 21 21 21                           | P 21 21 21                           |
| Hall group     | P 2ac 2ab                            | P 2ac 2ab                            |
| Moiety formula | 2(C70 H75 Cl2 Fe N3), 3(C<br>H2 Cl2) | 2(C70 H75 Cl2 Fe N3), 3(C<br>H2 Cl2) |
| Sum formula    | C143 H156 Cl10 Fe2 N6                | C143 H156 Cl10 Fe2 N6                |
| Mr             | 2424.95                              | 2424.93                              |
| Dx,g cm-3      | 1.269                                | 1.269                                |
| Z              | 4                                    | 4                                    |
| Mu (mm-1)      | 0.492                                | 0.492                                |
| F000           | 5112.0                               | 5112.0                               |
| F000'          | 5122.08                              |                                      |
| h,k,lmax       | 22,22,41                             | 22,22,41                             |
| Nref           | 22371[ 12106]                        | 21892                                |
| Tmin,Tmax      | 0.913,0.970                          | 0.644,1.000                          |
| Tmin'          | 0.913                                |                                      |

Correction method= # Reported T Limits: Tmin=0.644 Tmax=1.000  
AbsCorr = MULTI-SCAN

Data completeness= 1.81/0.98            Theta(max)= 25.000

R(reflections)= 0.0953( 13352)        wR2(reflections)= 0.2913( 21892)

S = 1.024                                Npar= 1376

The following ALERTS were generated. Each ALERT has the format  
**test-name\_ALERT\_alert-type\_alert-level**.  
Click on the hyperlinks for more details of the test.

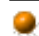

#### Alert level B

PLAT341\_ALERT\_3\_B Low Bond Precision on C-C Bonds ..... 0.01846 Ang.

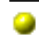

#### Alert level C

RINTA01\_ALERT\_3\_C The value of Rint is greater than 0.12  
Rint given 0.122

PLAT020\_ALERT\_3\_C The Value of Rint is Greater Than 0.12 ..... 0.122 Report

PLAT084\_ALERT\_3\_C High wR2 Value (i.e. > 0.25) ..... 0.29 Report

PLAT220\_ALERT\_2\_C NonSolvent Resd 1 C Ueq(max)/Ueq(min) Range 3.6 Ratio

PLAT220\_ALERT\_2\_C NonSolvent Resd 2 C Ueq(max)/Ueq(min) Range 4.0 Ratio

PLAT234\_ALERT\_4\_C Large Hirshfeld Difference C87 --C88 . 0.19 Ang.

PLAT234\_ALERT\_4\_C Large Hirshfeld Difference C89 --C90 . 0.19 Ang.

PLAT234\_ALERT\_4\_C Large Hirshfeld Difference C89 --C94 . 0.23 Ang.

PLAT234\_ALERT\_4\_C Large Hirshfeld Difference C95 --C99 . 0.20 Ang.

PLAT234\_ALERT\_4\_C Large Hirshfeld Difference C118 --C119 . 0.16 Ang.

PLAT234\_ALERT\_4\_C Large Hirshfeld Difference C118 --C122 . 0.16 Ang.

PLAT234\_ALERT\_4\_C Large Hirshfeld Difference C124 --C129 . 0.21 Ang.

PLAT234\_ALERT\_4\_C Large Hirshfeld Difference C132 --C133 . 0.19 Ang.

PLAT234\_ALERT\_4\_C Large Hirshfeld Difference C8 --C9 . 0.18 Ang.

PLAT234\_ALERT\_4\_C Large Hirshfeld Difference C13 --C14 . 0.17 Ang.

|                   |       |               |                                 |      |                        |   |       |       |
|-------------------|-------|---------------|---------------------------------|------|------------------------|---|-------|-------|
| PLAT234_ALERT_4_C | Large | Hirshfeld     | Difference                      | C15  | --C16                  | . | 0.18  | Ang.  |
| PLAT234_ALERT_4_C | Large | Hirshfeld     | Difference                      | C22  | --C23                  | . | 0.19  | Ang.  |
| PLAT234_ALERT_4_C | Large | Hirshfeld     | Difference                      | C32  | --C33                  | . | 0.21  | Ang.  |
| PLAT234_ALERT_4_C | Large | Hirshfeld     | Difference                      | C35  | --C36                  | . | 0.17  | Ang.  |
| PLAT234_ALERT_4_C | Large | Hirshfeld     | Difference                      | C44  | --C45                  | . | 0.16  | Ang.  |
| PLAT234_ALERT_4_C | Large | Hirshfeld     | Difference                      | C54  | --C59                  | . | 0.25  | Ang.  |
| PLAT234_ALERT_4_C | Large | Hirshfeld     | Difference                      | C60  | --C65                  | . | 0.17  | Ang.  |
| PLAT234_ALERT_4_C | Large | Hirshfeld     | Difference                      | C66  | --C67                  | . | 0.17  | Ang.  |
| PLAT241_ALERT_2_C | High  | 'MainMol'     | Ueq as Compared to Neighbors of |      |                        |   | C80   | Check |
| PLAT241_ALERT_2_C | High  | 'MainMol'     | Ueq as Compared to Neighbors of |      |                        |   | C85   | Check |
| PLAT241_ALERT_2_C | High  | 'MainMol'     | Ueq as Compared to Neighbors of |      |                        |   | C87   | Check |
| PLAT241_ALERT_2_C | High  | 'MainMol'     | Ueq as Compared to Neighbors of |      |                        |   | C90   | Check |
| PLAT241_ALERT_2_C | High  | 'MainMol'     | Ueq as Compared to Neighbors of |      |                        |   | C94   | Check |
| PLAT241_ALERT_2_C | High  | 'MainMol'     | Ueq as Compared to Neighbors of |      |                        |   | C97   | Check |
| PLAT241_ALERT_2_C | High  | 'MainMol'     | Ueq as Compared to Neighbors of |      |                        |   | C99   | Check |
| PLAT241_ALERT_2_C | High  | 'MainMol'     | Ueq as Compared to Neighbors of |      |                        |   | C120  | Check |
| PLAT241_ALERT_2_C | High  | 'MainMol'     | Ueq as Compared to Neighbors of |      |                        |   | C121  | Check |
| PLAT241_ALERT_2_C | High  | 'MainMol'     | Ueq as Compared to Neighbors of |      |                        |   | C128  | Check |
| PLAT241_ALERT_2_C | High  | 'MainMol'     | Ueq as Compared to Neighbors of |      |                        |   | C135  | Check |
| PLAT241_ALERT_2_C | High  | 'MainMol'     | Ueq as Compared to Neighbors of |      |                        |   | C139  | Check |
| PLAT241_ALERT_2_C | High  | 'MainMol'     | Ueq as Compared to Neighbors of |      |                        |   | C10   | Check |
| PLAT241_ALERT_2_C | High  | 'MainMol'     | Ueq as Compared to Neighbors of |      |                        |   | C15   | Check |
| PLAT241_ALERT_2_C | High  | 'MainMol'     | Ueq as Compared to Neighbors of |      |                        |   | C50   | Check |
| PLAT241_ALERT_2_C | High  | 'MainMol'     | Ueq as Compared to Neighbors of |      |                        |   | C51   | Check |
| PLAT241_ALERT_2_C | High  | 'MainMol'     | Ueq as Compared to Neighbors of |      |                        |   | C58   | Check |
| PLAT241_ALERT_2_C | High  | 'MainMol'     | Ueq as Compared to Neighbors of |      |                        |   | C59   | Check |
| PLAT241_ALERT_2_C | High  | 'MainMol'     | Ueq as Compared to Neighbors of |      |                        |   | C69   | Check |
| PLAT242_ALERT_2_C | Low   | 'MainMol'     | Ueq as Compared to Neighbors of |      |                        |   | C77   | Check |
| PLAT242_ALERT_2_C | Low   | 'MainMol'     | Ueq as Compared to Neighbors of |      |                        |   | C86   | Check |
| PLAT242_ALERT_2_C | Low   | 'MainMol'     | Ueq as Compared to Neighbors of |      |                        |   | C89   | Check |
| PLAT242_ALERT_2_C | Low   | 'MainMol'     | Ueq as Compared to Neighbors of |      |                        |   | C95   | Check |
| PLAT242_ALERT_2_C | Low   | 'MainMol'     | Ueq as Compared to Neighbors of |      |                        |   | C119  | Check |
| PLAT242_ALERT_2_C | Low   | 'MainMol'     | Ueq as Compared to Neighbors of |      |                        |   | C129  | Check |
| PLAT242_ALERT_2_C | Low   | 'MainMol'     | Ueq as Compared to Neighbors of |      |                        |   | C130  | Check |
| PLAT242_ALERT_2_C | Low   | 'MainMol'     | Ueq as Compared to Neighbors of |      |                        |   | C48   | Check |
| PLAT242_ALERT_2_C | Low   | 'MainMol'     | Ueq as Compared to Neighbors of |      |                        |   | C54   | Check |
| PLAT242_ALERT_2_C | Low   | 'MainMol'     | Ueq as Compared to Neighbors of |      |                        |   | C66   | Check |
| PLAT244_ALERT_4_C | Low   | 'Solvent'     | Ueq as Compared to Neighbors of |      |                        |   | C142  | Check |
| PLAT260_ALERT_2_C | Large | Average       | Ueq of Residue Including        | C15  |                        |   | 0.149 | Check |
| PLAT260_ALERT_2_C | Large | Average       | Ueq of Residue Including        | C17  |                        |   | 0.132 | Check |
| PLAT334_ALERT_2_C | Small | Aver. Benzene | C-C Dist                        | C71  | -C76                   |   | 1.37  | Ang.  |
| PLAT360_ALERT_2_C | Short | C(sp3)-C(sp3) | Bond                            | C139 | -C140                  | . | 1.41  | Ang.  |
| PLAT411_ALERT_2_C | Short | Inter H...H   | Contact                         | H9A  | ..H11D                 | . | 2.11  | Ang.  |
|                   |       |               |                                 |      | $1-x, -1/2+y, 1/2-z =$ |   | 4_645 | Check |

### ● Alert level G

|                   |                                                  |          |        |   |                      |  |       |              |
|-------------------|--------------------------------------------------|----------|--------|---|----------------------|--|-------|--------------|
| PLAT002_ALERT_2_G | Number of Distance or Angle Restraints on AtSite |          |        |   |                      |  | 5     | Note         |
| PLAT003_ALERT_2_G | Number of Uiso or Uij Restrained non-H Atoms ... |          |        |   |                      |  | 73    | Report       |
| PLAT012_ALERT_1_G | N.O.K. _shelx_res_checksum Found in CIF .....    |          |        |   |                      |  |       | Please Check |
| PLAT072_ALERT_2_G | SHELXL First Parameter in WGHT Unusually Large   |          |        |   |                      |  | 0.15  | Report       |
| PLAT083_ALERT_2_G | SHELXL Second Parameter in WGHT Unusually Large  |          |        |   |                      |  | 7.33  | Why ?        |
| PLAT172_ALERT_4_G | The CIF-Embedded .res File Contains DFIX Records |          |        |   |                      |  | 1     | Report       |
| PLAT177_ALERT_4_G | The CIF-Embedded .res File Contains DELU Records |          |        |   |                      |  | 1     | Report       |
| PLAT178_ALERT_4_G | The CIF-Embedded .res File Contains SIMU Records |          |        |   |                      |  | 1     | Report       |
| PLAT186_ALERT_4_G | The CIF-Embedded .res File Contains ISOR Records |          |        |   |                      |  | 2     | Report       |
| PLAT232_ALERT_2_G | Hirshfeld Test Diff (M-X)                        | Fe2      | --C14  | . |                      |  | 10.4  | s.u.         |
| PLAT301_ALERT_3_G | Main Residue Disorder .....                      | (Resd 1) |        |   |                      |  | 3%    | Note         |
| PLAT432_ALERT_2_G | Short Inter X...Y Contact                        | C13A     | ..C87  |   |                      |  | 3.01  | Ang.         |
|                   |                                                  |          |        |   | $-x, 1/2+y, 1/2-z =$ |  | 4_555 | Check        |
| PLAT432_ALERT_2_G | Short Inter X...Y Contact                        | C14A     | ..C142 |   |                      |  | 3.20  | Ang.         |

|                                                                    |         |             |
|--------------------------------------------------------------------|---------|-------------|
| PLAT432_ALERT_2_G Short Inter X...Y Contact Cl4A                   | x,y,z = | 1_555 Check |
|                                                                    | ..C37   | 3.23 Ang.   |
| PLAT794_ALERT_5_G Tentative Bond Valency for Fe1                   | (II)    | 1.92 Info   |
| PLAT860_ALERT_3_G Number of Least-Squares Restraints .....         |         | 447 Note    |
| PLAT870_ALERT_4_G ALERTS Related to Twinning Effects Suppressed .. |         | ! Info      |
| PLAT883_ALERT_1_G No Info/Value for _atom_sites_solution_primary . |         | Please Do ! |
| PLAT933_ALERT_2_G Number of OMIT Records in Embedded .res File ... |         | 3 Note      |

---

0 **ALERT level A** = Most likely a serious problem - resolve or explain  
1 **ALERT level B** = A potentially serious problem, consider carefully  
58 **ALERT level C** = Check. Ensure it is not caused by an omission or oversight  
19 **ALERT level G** = General information/check it is not something unexpected

2 ALERT type 1 CIF construction/syntax error, inconsistent or missing data  
45 ALERT type 2 Indicator that the structure model may be wrong or deficient  
6 ALERT type 3 Indicator that the structure quality may be low  
24 ALERT type 4 Improvement, methodology, query or suggestion  
1 ALERT type 5 Informative message, check

---

It is advisable to attempt to resolve as many as possible of the alerts in all categories. Often the minor alerts point to easily fixed oversights, errors and omissions in your CIF or refinement strategy, so attention to these fine details can be worthwhile. In order to resolve some of the more serious problems it may be necessary to carry out additional measurements or structure refinements. However, the purpose of your study may justify the reported deviations and the more serious of these should normally be commented upon in the discussion or experimental section of a paper or in the "special\_details" fields of the CIF. checkCIF was carefully designed to identify outliers and unusual parameters, but every test has its limitations and alerts that are not important in a particular case may appear. Conversely, the absence of alerts does not guarantee there are no aspects of the results needing attention. It is up to the individual to critically assess their own results and, if necessary, seek expert advice.

### **Publication of your CIF in IUCr journals**

A basic structural check has been run on your CIF. These basic checks will be run on all CIFs submitted for publication in IUCr journals (*Acta Crystallographica*, *Journal of Applied Crystallography*, *Journal of Synchrotron Radiation*); however, if you intend to submit to *Acta Crystallographica Section C* or *E* or *IUCrData*, you should make sure that full publication checks are run on the final version of your CIF prior to submission.

### **Publication of your CIF in other journals**

Please refer to the *Notes for Authors* of the relevant journal for any special instructions relating to CIF submission.

---

**PLATON version of 16/07/2020; check.def file version of 12/07/2020**

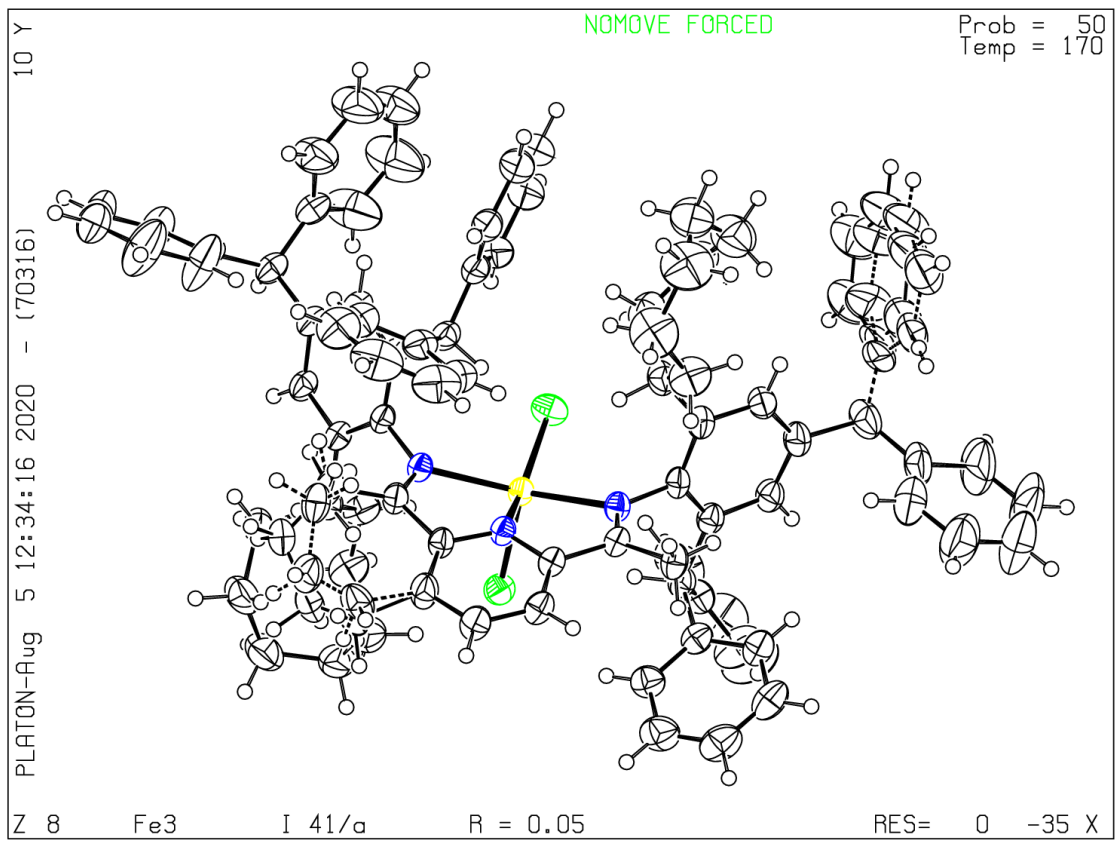

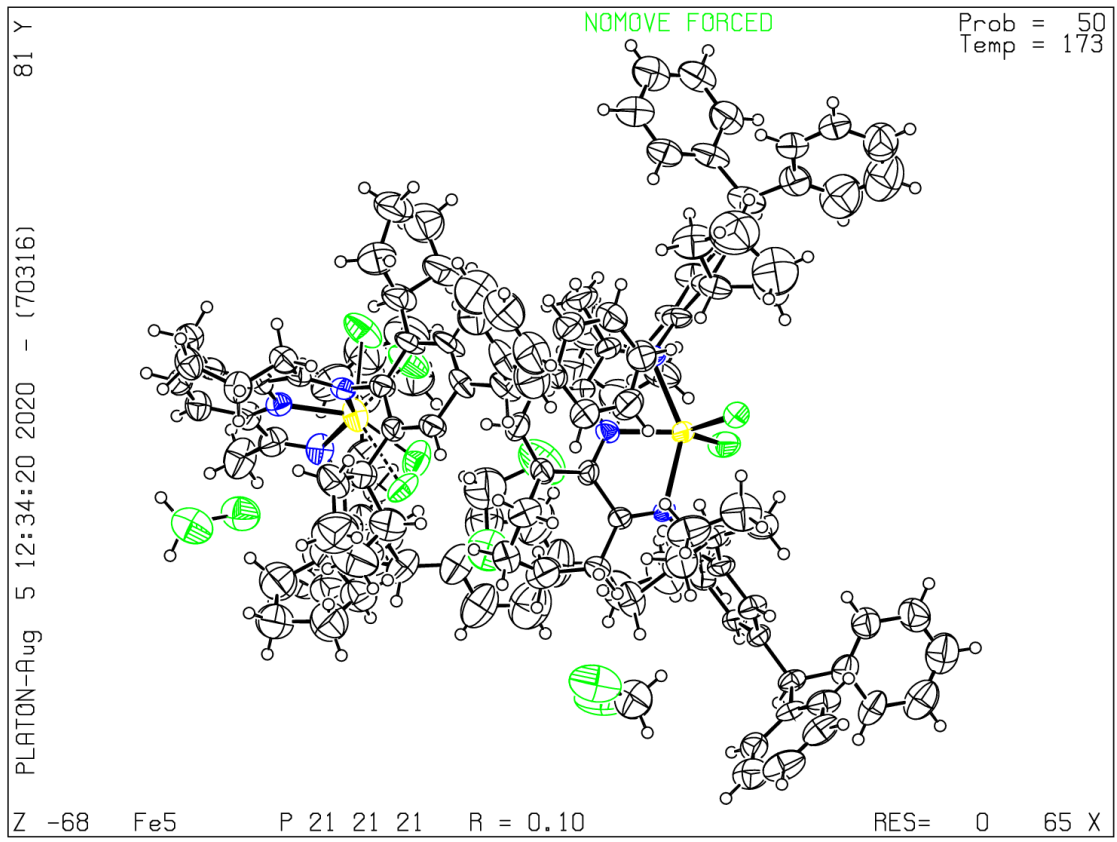

Supplement: s1 [file s1]
